# Supplementary material for: Rare ginsenoside Ia synthesized from F1 by cloning and overexpression of the UDP-glycosyltransferase gene from Bacillus subtilis: synthesis, characterization, and in vitro melanogenesis inhibition activity in BL6B16 cells
Source: PubMed Central journal article supplement — J Ginseng Res. 2016 Dec 24;42(1):42–9. doi: 10.1016/j.jgr.2016.12.009 (PMC5766694; doi:10.1016/j.jgr.2016.12.009), 2016-12-24
Supplement: mmc1.pdf [file mmc1.pdf]

1

2 **Supplementary Table 1.**  $^1\text{H}$ -NMR (400 MHz) and  $^{13}\text{C}$ -NMR (100 MHz) data

3 (CD<sub>3</sub>OD) of ginsenoside Ia

| C  | $\delta_{\text{C}}$ | $\delta_{\text{H}}$               |
|----|---------------------|-----------------------------------|
| 1  | 40.1                | -                                 |
| 2  | 27.3                | -                                 |
| 3  | 90.8                | 3.13, dd, $J = 3.7, 8.0$ Hz       |
| 4  | 41.1                | -                                 |
| 5  | 62.5                | -                                 |
| 6  | 68.9                | 4.03, ddd, $J=3.7, 10.6, 10.6$ Hz |
| 7  | 47.3                | -                                 |
| 8  | 42.1                | -                                 |
| 9  | 50.6                | -                                 |
| 10 | 39.9                | -                                 |
| 11 | 31.4                | -                                 |
| 12 | 71.3                | 3.28, m                           |
| 13 | 49.5                | -                                 |
| 14 | 52.5                | -                                 |
| 15 | 31.1                | -                                 |
| 16 | 27.1                | -                                 |
| 17 | 53.2                | -                                 |

|      |       |                       |
|------|-------|-----------------------|
| 18   | 17.9  | 1.11, 3H, s           |
| 19   | 17.8  | 1.05, 3H, s           |
| 20   | 85.0  | –                     |
| 21   | 22.9  | 1.35, 3H, s           |
| 22   | 36.7  | –                     |
| 23   | 24.4  | –                     |
| 24   | 126.0 | 5.11, t, $J = 5.3$ Hz |
| 25   | 132.4 | –                     |
| 26   | 26.0  | 1.66, 3H, s           |
| 27   | 18.1  | 1.63, 3H, s           |
| 28   | 31.8  | 1.37, 3H, s           |
| 29   | 17.0  | 0.96, 3H, s           |
| 30   | 17.4  | 0.97, 3H, s           |
| C-1' | 107.1 | 4.31, d, $J = 7.8$ Hz |
| C-2' | 76.4  | –                     |
| C-3' | 78.2  | –                     |
| C-4' | 74.0  | –                     |
| C-5' | 78.1  | –                     |
| C-6' | 62.9  | –                     |
| C-1" | 98.4  | 4.61, d, $J = 7.8$ Hz |
| C-2" | 75.5  | –                     |

|      |      |   |
|------|------|---|
| C-3" | 78.4 | – |
| C-4" | 72.0 | – |
| C-5" | 77.8 | – |
| C-6" | 62.7 | – |

---

4
